# Supplementary material for: Tissue Microbiome Profiling Identifies an Enrichment of Specific Enteric Bacteria in Opisthorchis viverrini Associated Cholangiocarcinoma
Source: PubMed Central journal article supplement (PMC4919562; doi:10.1016/j.ebiom.2016.04.034), 2016-05-06
Supplement: mmc1.pdf [file mmc1.pdf]

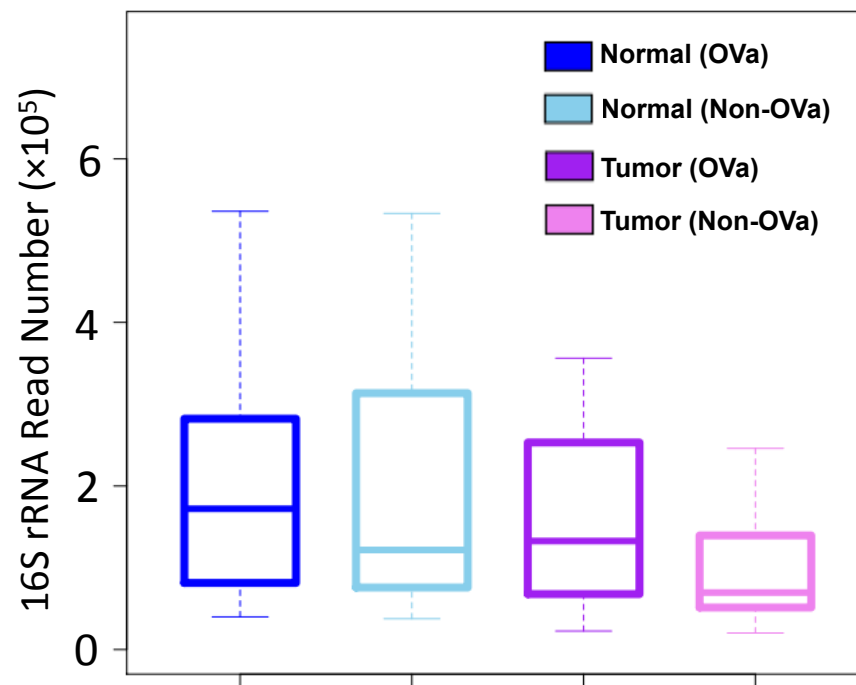

**Supplementary Figure 1. Boxplots showing the number of 16S rRNA reads for different groups of samples.**

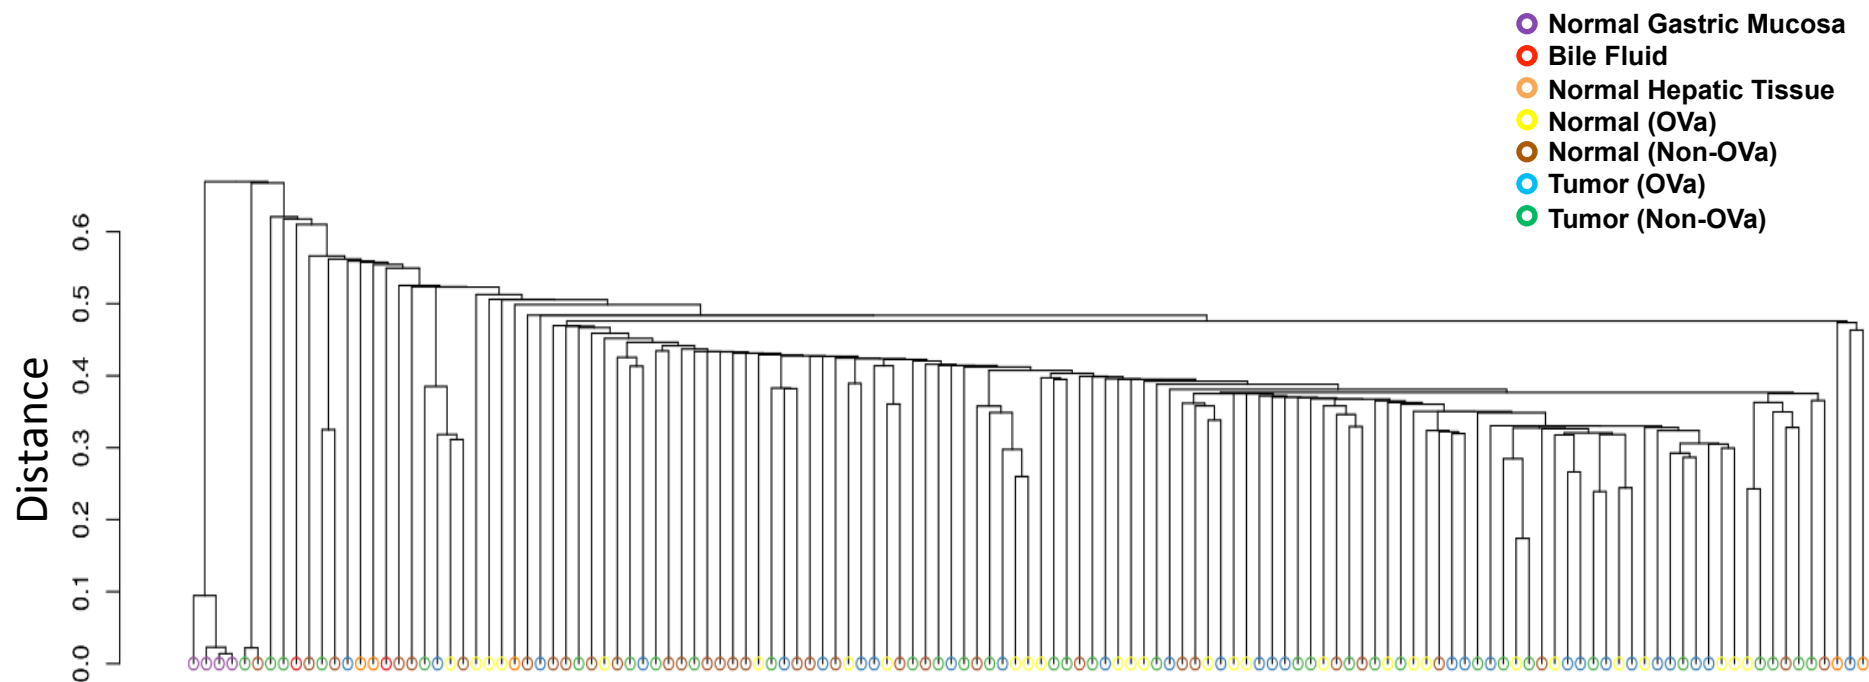

**Supplementary Figure 2. Clustering of microbiome profiles from different samples.**

Dendrogram representation was derived from single-linkage clustering on unweighted UniFrac distances of microbiome profiles from non-cancer hepatic tissue (n=5), bile fluid from CCA patients (n=2), non-cancer gastric mucosa (n=4) and paired tumor-normal OVa (n=28 pairs) and non-OVa (n=32 pairs) samples from CCA patients. The clustering recapitulates patterns seen in the PCoA plot in **Figure 1E**, with samples from non-cancer gastric mucosa clustering together and being clearly distinct from tumor and adjacent normal tissues from CCA patients.

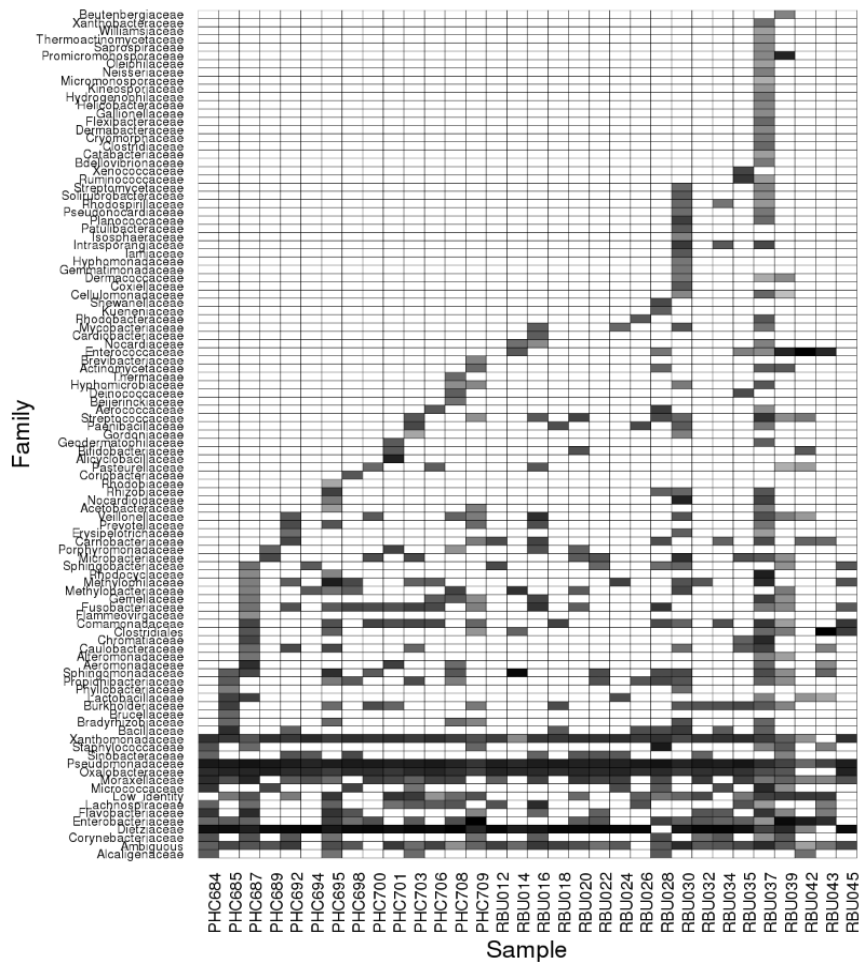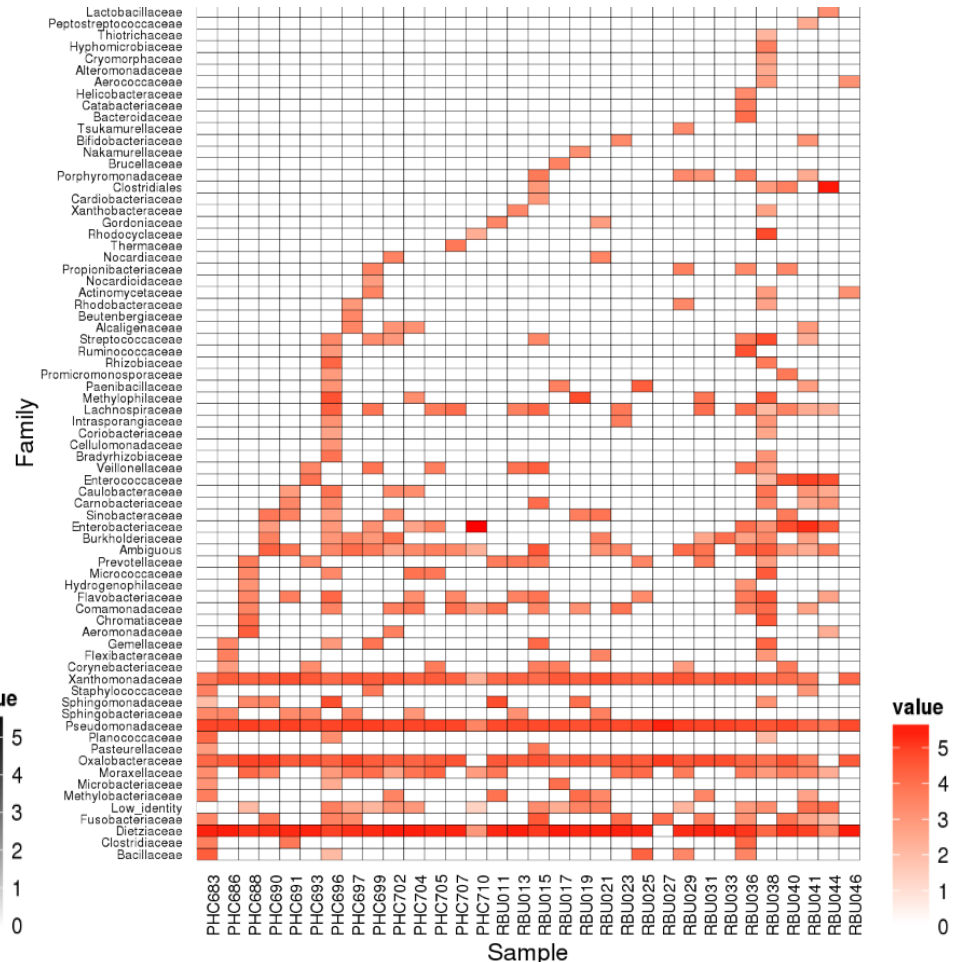

**Supplementary Figure 3. Heatmaps showing logarithm of normalised 16S rRNA reads from different families in non-*O. viverrini* associated (Left) normal and (Right) tumor tissue samples (n=32).**

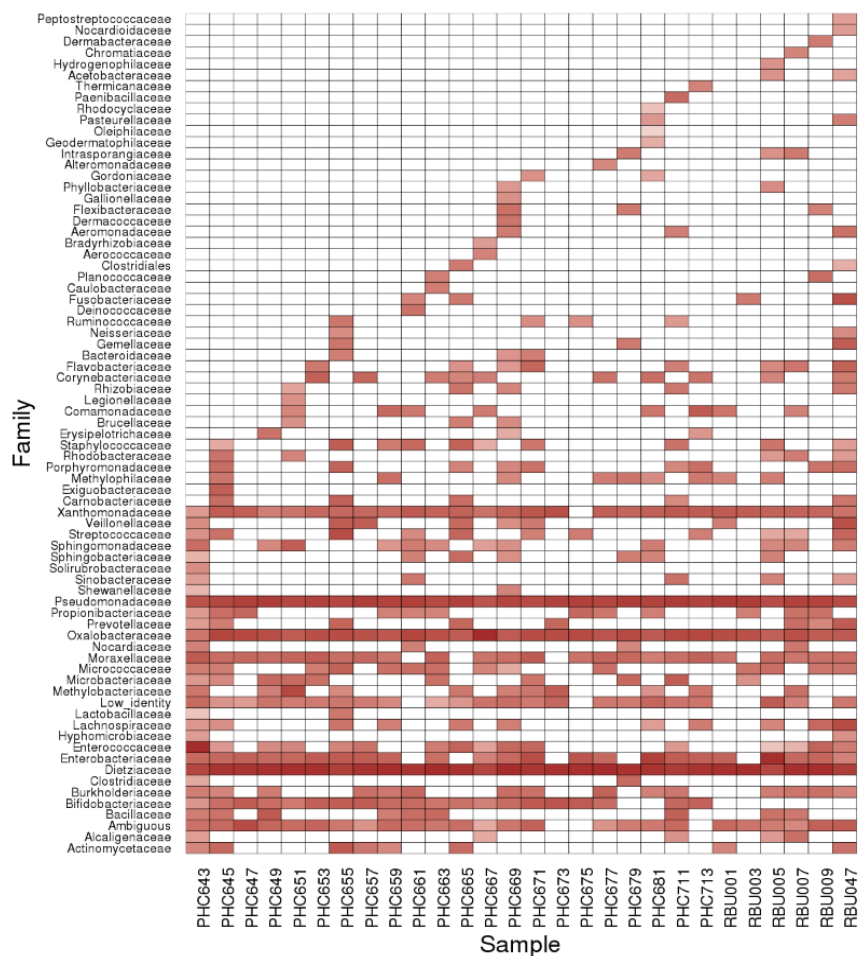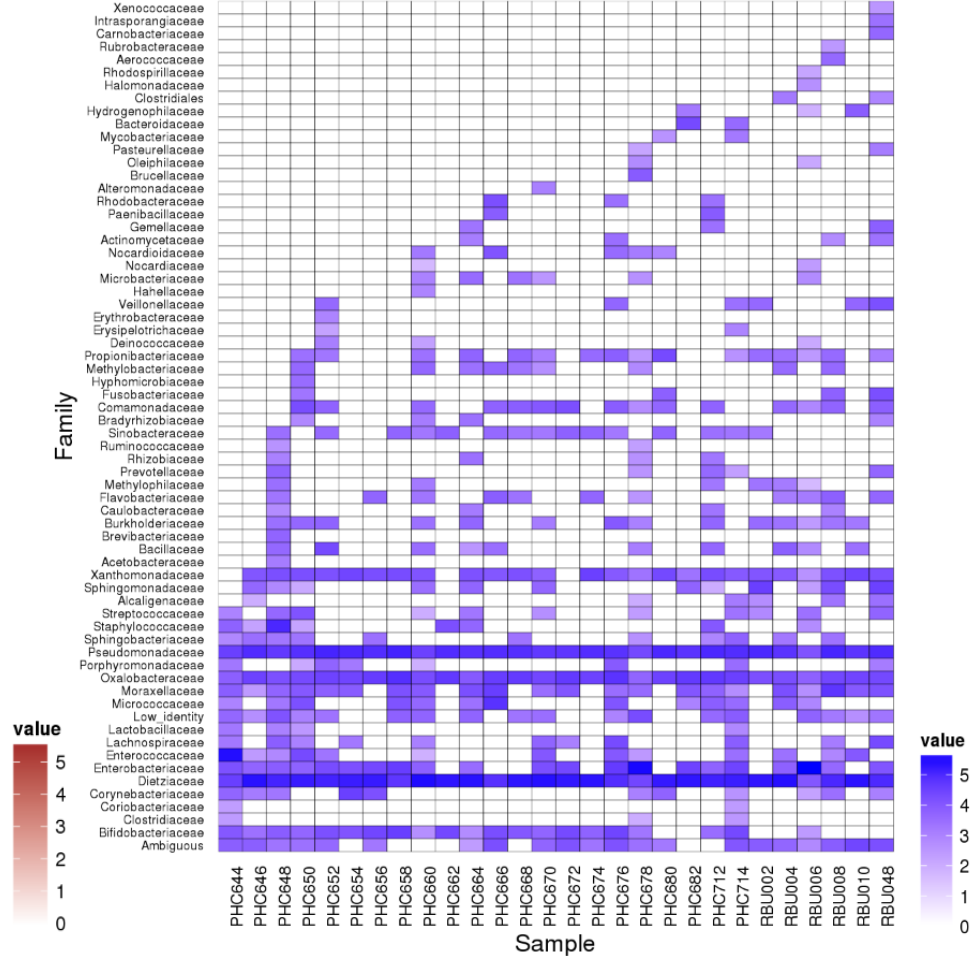

**Supplementary Figure 4. Heatmaps showing logarithm of normalised 16S rRNA reads from different families in *O. viverrini* associated (Left) normal and (Right) tumor tissue samples (n=28).**

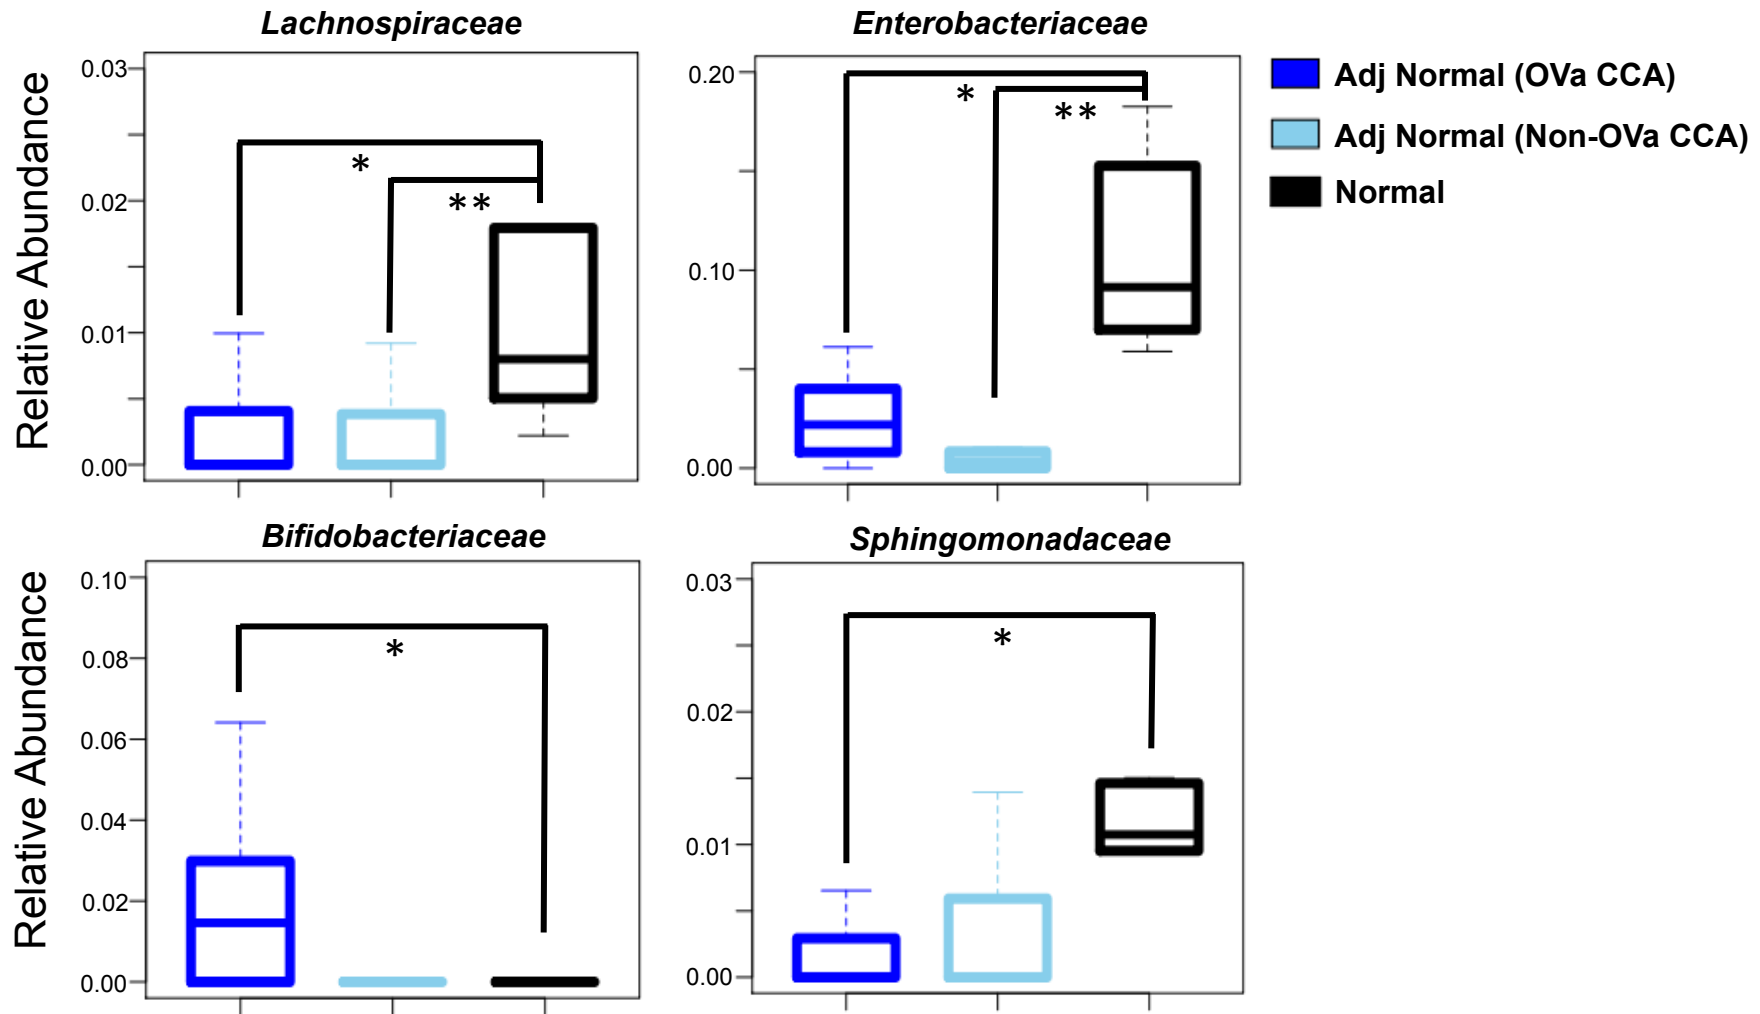

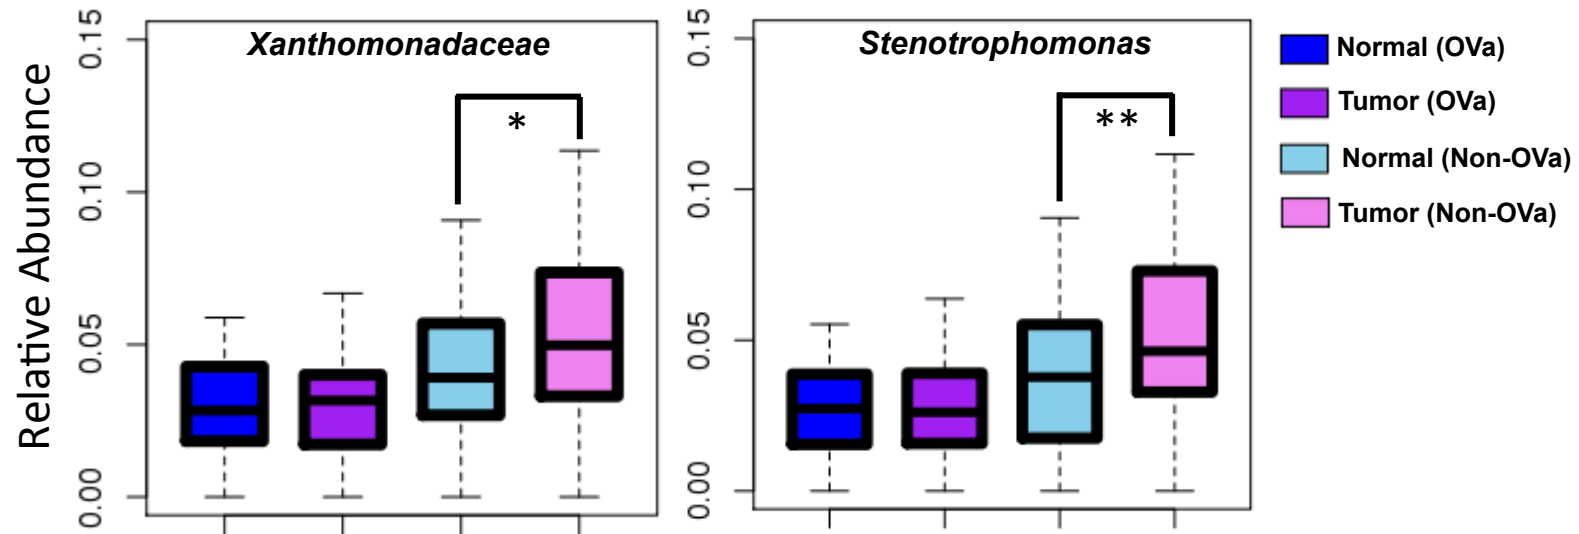

**Supplementary Figure 6. Boxplots showing relative abundance of bacteria enriched in non-OVa tumor tissues versus paired normal (28 OVa and 32 non-OVa).** The left plot is at the family level while the right plot is at the genus level. All  $p$ -values were calculated using Wilcoxon signed-rank test, where \*\* and \* represent FDR adjusted  $p$ -value < 0.05 and 0.1 respectively.
